# Supplementary material for: Coordination and thermophysical properties of select trivalent lanthanides in LiCl–KCl
Source: Royal Society of Chemistry journal article supplement (doi:10.1039/d1cp03056f), 2022-01-01
Supplement: d1cp03056f1.pdf [file d1cp03056f1.pdf]

**Electronic Supplementary Information for**  
**Coordination and Thermophysical Properties of Select Trivalent Lanthanides in LiCl-KCl**

Jon Fuller<sup>1</sup>, Jeremy Moon<sup>1</sup>, Jing Zhang<sup>1</sup>, Dev Chidambaram<sup>1</sup> and Qi An<sup>1\*</sup>

<sup>1</sup> Department of Chemical and Materials Engineering, University of Nevada – Reno, Nevada  
89577, United States

**Table of Contents:**

**Supplemental Data Items**

**Fig S1-S4**

Fig S1 – QM-MD Coordination of CeCl<sub>3</sub> in LiCl-KCl

Fig S2 – RDF and CN for 19.4 wt.% CeCl<sub>3</sub> in LiCl-KCl

Fig S3 – Vibrational Density of States for LiCl-KCl Eutectic at 500°C.

Fig S4 – Vibrational DOS of Sm<sup>3+</sup> (red) and Eu<sup>3+</sup> (blue) in LiCl-KCl eutectic composition, overlaid.

## Supplemental Data Items

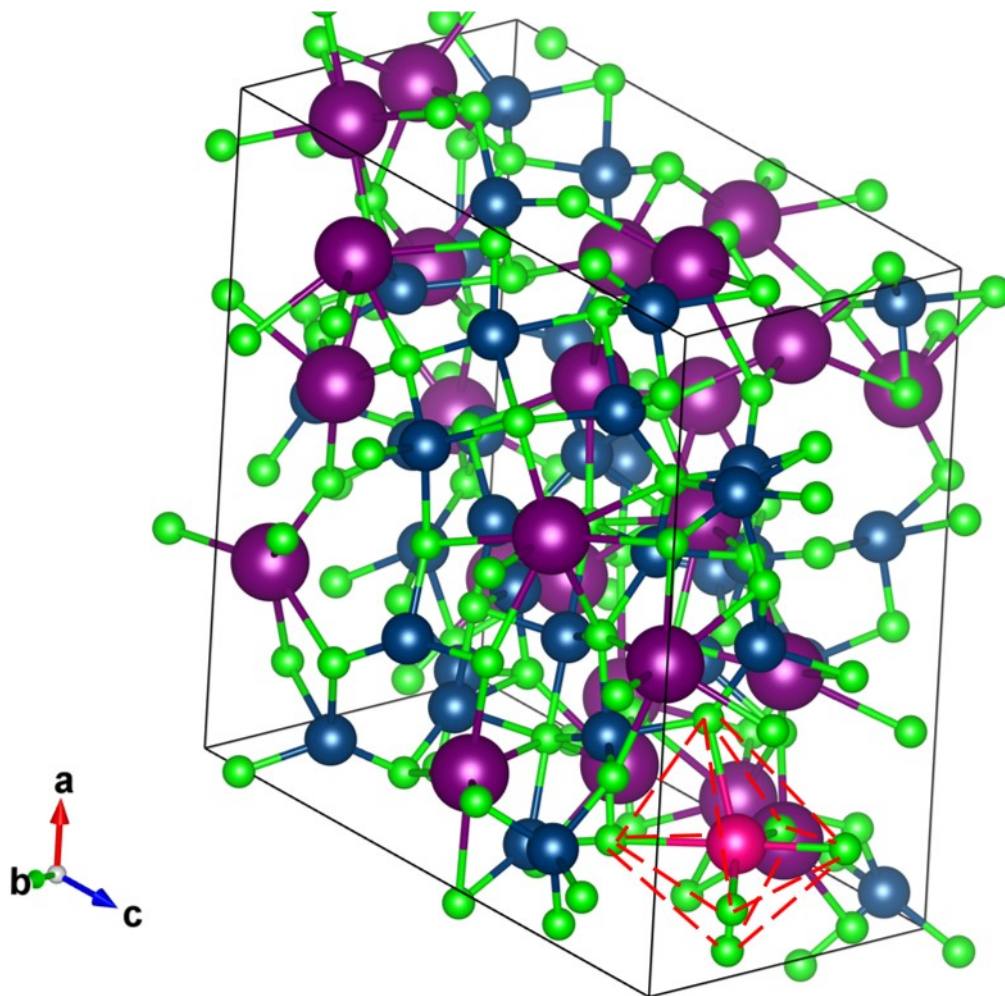

**Fig. S1** - QM-MD-obtained preferred coordination of trivalent Ce in magenta. Li, Cl and K atoms are shown in dark blue, green and purple, respectively. The octahedral  $\text{CeCl}_6^{3-}$  structure is shown with dashed red lines to indicate the geometry of the chlorocomplex. Significant distortion from an ideal octahedral structure is noted in the chlorocomplex for low wt.% (single Ce) systems.

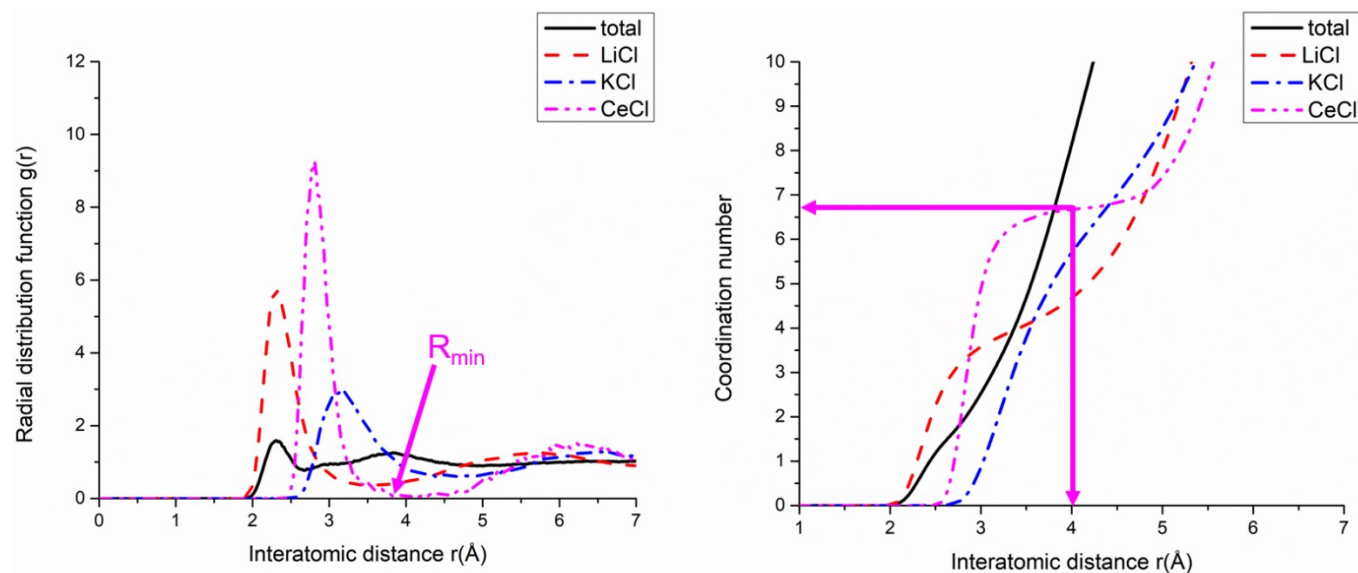

**Fig. S2** - Radial distribution function  $g(r)$  (left) and coordination number (right) for  $\text{Ce}^{3+}$  ( $\text{CeCl}_6^{3-}$ ) (19.4 wt. %) in LiCl-KCl eutectic composition at  $500^\circ\text{C}$ . LiCl, KCl, and CeCl are represented by dashed red, blue and magenta lines, respectively, while the average total values of RDF and CN are represented by a black line.  $R_{\min}$  and CN are indicated with magenta arrows for clarity. The CN for CeCl is found to be decreased with respect to the low wt. % case shown in Fig. 3, with corresponding increases in the CN for LiCl and KCl.

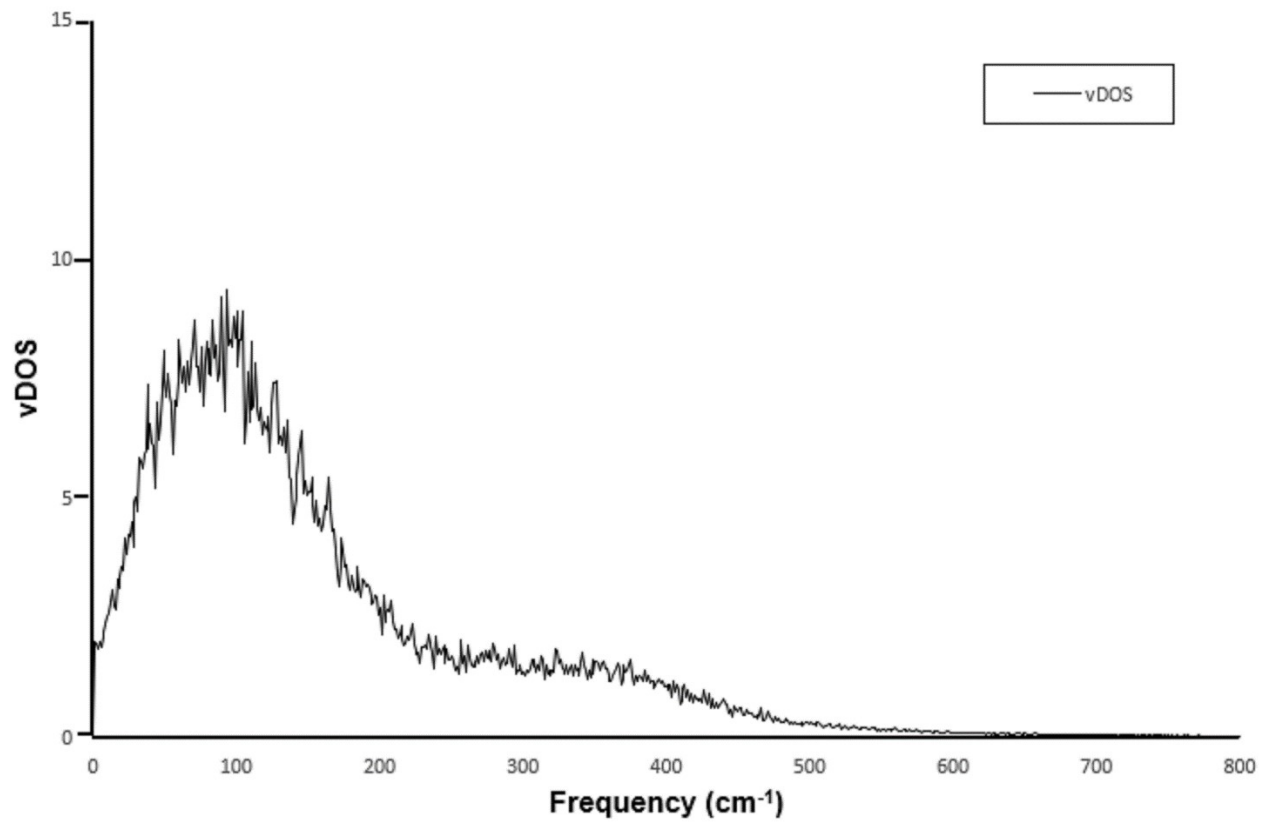

**Fig. S3** - Vibrational DOS (black) of LiCl-KCl eutectic at 500°C.

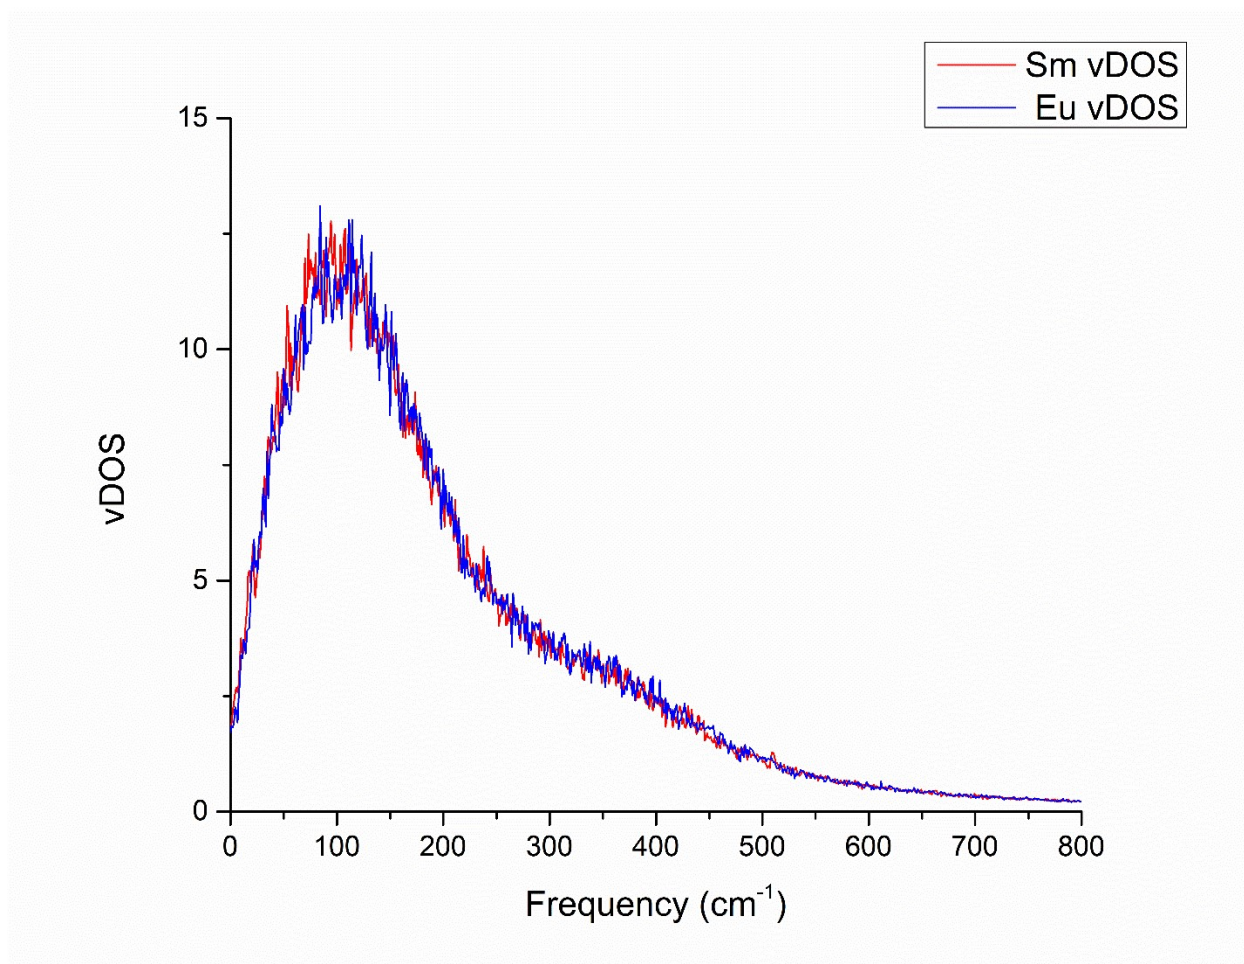

**Fig. S4** – Vibrational DOS of  $\text{Sm}^{3+}$  (red) and  $\text{Eu}^{3+}$  (blue) in LiCl-KCl eutectic composition, overlaid. Primary difference is noted in the main response region ( $\sim 50\text{-}150\text{ cm}^{-1}$ ) with general similarity across the rest of the vDOS.
